# Supplementary material for: Machine learning improves risk stratification of coronary heart disease and stroke
Source: PubMed Central journal article supplement — Ann Transl Med. 2022 Nov;10(21):1156. doi: 10.21037/atm-22-1916 (PMC9708484; doi:10.21037/atm-22-1916), 2022-11
Supplement: atm-10-21-1156-dss.pdf [file atm-10-21-1156-dss.pdf]

## Data Sharing Statement

|                     |                                                                                                                                                     |                                                                                                                                                                                                                           |
|---------------------|-----------------------------------------------------------------------------------------------------------------------------------------------------|---------------------------------------------------------------------------------------------------------------------------------------------------------------------------------------------------------------------------|
| <b>Article Info</b> | <a href="https://dx.doi.org/10.21037/atm-22-1916">https://dx.doi.org/10.21037/atm-22-1916</a>                                                       |                                                                                                                                                                                                                           |
| <b>Item</b>         | <b>Question</b>                                                                                                                                     | <b>Authors' Response<br/>(place "-" if not applicable)</b>                                                                                                                                                                |
| 1                   | Would you like to share data collected for your study to others?                                                                                    | The data that support the findings of this study are available on reasonable request from the corresponding author.                                                                                                       |
| 2                   | If not, would you like to share the reason for your decision?                                                                                       | -                                                                                                                                                                                                                         |
| 3                   | What data in particular will be shared?                                                                                                             | Individual participant data that underlie the results reported in this article, after deidentification.                                                                                                                   |
| 4                   | Any other documents will be shared? Such as study protocol, statistical analysis plan, informed consent form, clinical study report, analytic code. | -                                                                                                                                                                                                                         |
| 5                   | When will data availability begin?                                                                                                                  | From the publication date.                                                                                                                                                                                                |
| 6                   | When will data availability end?                                                                                                                    | No end date.                                                                                                                                                                                                              |
| 7                   | To whom will you share the data?                                                                                                                    | Researchers who provide a methodologically sound proposal.                                                                                                                                                                |
| 8                   | For what type of analysis or purpose?                                                                                                               | To achieve aims in the approved proposal.                                                                                                                                                                                 |
| 9                   | How or where can the data/documents be obtained?                                                                                                    | Emails could be sent to the address below to obtain the shared data:<br><a href="mailto:chenweibang@genomics.cn">chenweibang@genomics.cn</a> . To gain access, data requestors will need to sign a data access agreement. |
| 10                  | Any other restrictions?                                                                                                                             | We may balance the potential benefits and risks for each request and then provide the data that could be shared.                                                                                                          |
